# Supplementary material
Source: PubMed Central journal article supplement (PMC2875060)
Supplement: NIHMS182477-supplement-04.pdf [file NIHMS182477-supplement-04.pdf]

**Supplementary Table. Comparisons of human biopsy sample microarray transcript measurements with cell culture quantitative RT-PCR and microarray transcript measurement. Ten highest IFN- $\beta$  10U/ml inducible transcripts from cell culture RT-PCR experiments listed.**

| Transcript | DM Biopsy Samples |                         | Cell Culture IFN- $\beta$ 10U |             | Cell Culture IFN- $\alpha$ 10U |             | Cell Culture IFN- $\beta$ 1U |             | Cell Culture IFN- $\alpha$ 1U |             |
|------------|-------------------|-------------------------|-------------------------------|-------------|--------------------------------|-------------|------------------------------|-------------|-------------------------------|-------------|
|            | Micro-array       | Other-IM Biopsy Samples | RT-PCR                        | Micro-array | RT-PCR                         | Micro-array | RT-PCR                       | Micro-array | RT-PCR                        | Micro-array |
| RSAD2      | 210.58            | 7.47                    | 41.01                         | 76.43       | 11.32                          | 22.58       | 3.96                         | 6.00        | 3.76                          | 6.38        |
| MXA        | 152.93            | 5.40                    | 38.46                         | 88.68       | 15.45                          | 47.10       | 5.63                         | 15.76       | 7.18                          | 20.33       |
| IFI44L     | 31.40             | 3.63                    | 14.72                         | 36.82       | 6.42                           | 18.90       | 3.07                         | 7.68        | 3.31                          | 9.56        |
| ISG15      | 193.84            | 7.12                    | 13.62                         | 14.80       | 5.06                           | 8.07        | 2.34                         | 4.80        | 2.87                          | 4.75        |
| IFI27      | 19.29             | 4.93                    | 11.70                         | 63.66       | 4.69                           | 35.96       | 1.97                         | 13.42       | 2.52                          | 17.79       |
| OAS1       | 99.23             | 2.51                    | 8.55                          | 17.99       | 4.35                           | 13.10       | 2.32                         | 4.93        | 2.85                          | 7.96        |
| HERC5      | 33.62             | 1.19                    | 6.40                          | 15.32       | 3.05                           | 10.43       | 1.92                         | 4.89        | 2.22                          | 5.17        |
| IFI44      | 6.40              | 1.26                    | 5.02                          | 7.53        | 2.34                           | 4.25        | 1.61                         | 2.13        | 1.91                          | 2.40        |
| USP18      | 36.85             | 1.29                    | 4.74                          | 6.19        | 2.70                           | 4.55        | 1.32                         | 1.96        | 1.97                          | 2.73        |
| IRF7       | 16.70             | 2.04                    | 4.41                          | 7.39        | 2.19                           | 4.75        | 1.73                         | 2.40        | 1.74                          | 3.16        |
